# Supplementary material
Source: publisher site journal article supplement (https://www.dovepress.com/article/317809)
Supplement: Supplementary file 1 [file get_supplementary_file.php]

## Medical Materials of three patients

### Patient no. 1

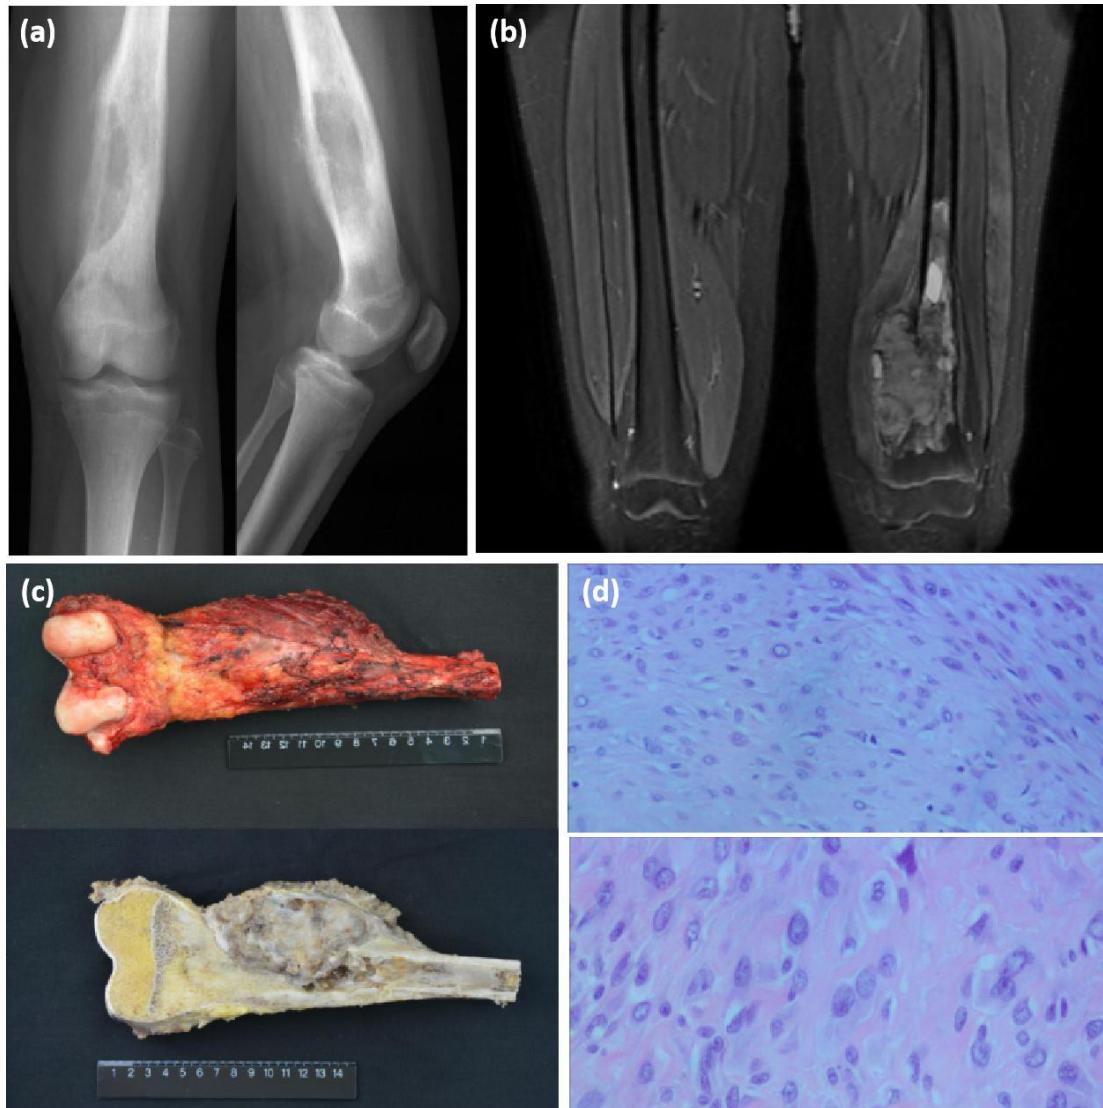

Supplementary Figure 1 Medical materials of patient no.1. (a) X-ray showed a localized mass on the left distal femur. (b) MRI show a localized mass on the left distal femurs. (c) Gross specimen of the resected primary tumor. (d) Hematoxylin and eosin (H&E) – stained slide of the primary tumor showed osteosarcoma.

Patient no.1 was an 18-year-old adolescent who was referred to our institution with chief complaint of progressive pain on left distal thigh for 4 months.

Radiograph demonstrated a mass on the left distal femur and a core biopsy proved an osteosarcoma. He received neo-adjuvant chemotherapy including adriamycin (A), cisplatin (P), methotrexate (M) and ifosfamide (I) (APMI) before limb-salvage surgery. Pathology of the resection specimen verified a fibroblastic osteosarcoma and the necrosis rate was 64.2%. He completed the postoperative chemotherapy with 4 cycles of APMI for 28 weeks. A nodule (3mm) on the right upper lobe was found by routine follow-up 6 months after the completion of adjuvant chemotherapy. The nodule was watched cautiously and found to be stable until one year after primary treatment. A PET-CT scan showed hypermetabolic lesions (7mm) of the right upper lobe and a local recurrence at primary surgical site (SUV<sub>max</sub>=9.5). Salvaged chemotherapy of ifosfamide and etoposide (IE) was given, being followed by surgical resection of recurrent tumor and lung metastasectomy. Pathology diagnosis of both lesions were osteosarcoma. Nine months after the lobectomy, another metastasis to the left lower lobe was detected on CT scan. Second metastasectomy was performed. The pathology of P1\_M2 showed an undifferentiated sarcoma. A second local recurrence and a third lung metastasis at right lower lobe was found at 5 months later. Combined of IE anti-PD-1 strategy was introduced 12 weeks before surgical removal. Both local recurrent tumor and lung metastasis were resected. Pleura dissemination was observed during the video-associated thoracic surgery (VATS). The patient received palliative chemotherapy of IE combined with anti-PD-1 strategy till now.

**Patient no.2**

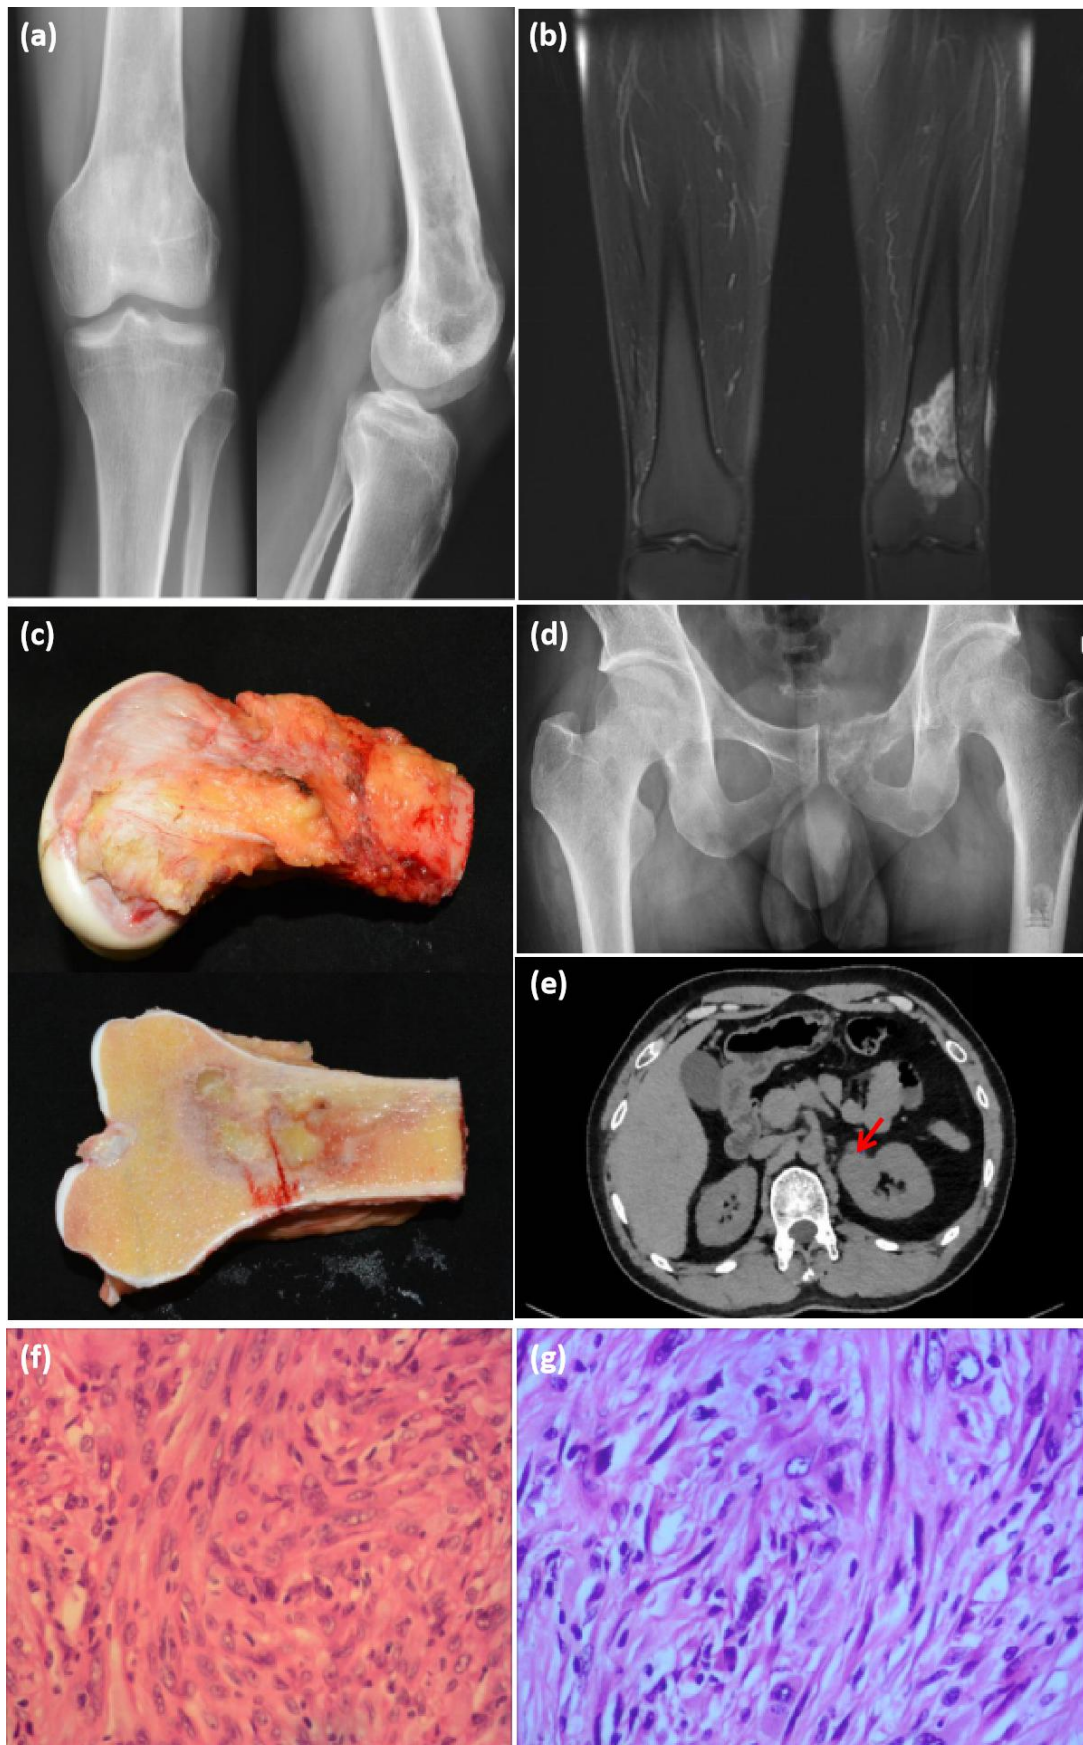

Figure 2 Medical materials of patient no.2. (a) X-ray showed a localized mass on the left distal femur. (b) MRI show a localized mass on the left distal femurs. (c) Gross specimen of the receted primary tumor. (d) X-ray of the pelvis showed osteolytic lesion on left pubis. (e) CT showed solitary mass on the left kidney (red arrow). (f) Hematoxylin and eosin (H&E)–stained slide of the primary lesion showed typical osteosarcoma. (g) H&E-stained slide of the renal metastasis showed undifferentiated sarcoma.

Patient no.2 was a 27-year-old male who presented with 1 month of pain in left distal thigh. Radiograph demonstrated an osteolytic lesion at distal femur. Osteosarcoma was proved by core needle biopsy. Neo-adjuvant chemotherapy of APMI was given before limb-salvage surgery. Postoperative pathology reported a fibroblastic osteosarcoma and necrosis rate of 92.8%. Postoperative chemotherapy was uneventful. Pubis metastasis was found at 4 years after completion of primary treatment. Resection of pubis was performed and the pathology diagnosis was undifferentiated sarcoma. Additional two cycles of API protocol were given after surgery. Kidney metastasis was found at nine months after completion of API chemotherapy. Left nephrectomy was carried out. Solitary soft tissue metastasis in right iliac fossa was found 3 months after nephrectomy. The metastasis was removed. Both lesions were proved to be undifferentiated sarcoma. Rapid systematic progression developed half year afterwards. PET-CT showed distal metastases including pancreas, lung, mesentery, muscles and lymph nodes. The patient was on palliative chemotherapy of IE combined with tyrosine kinase inhibitor (TKI), anlotinib.

### Patient no. 3

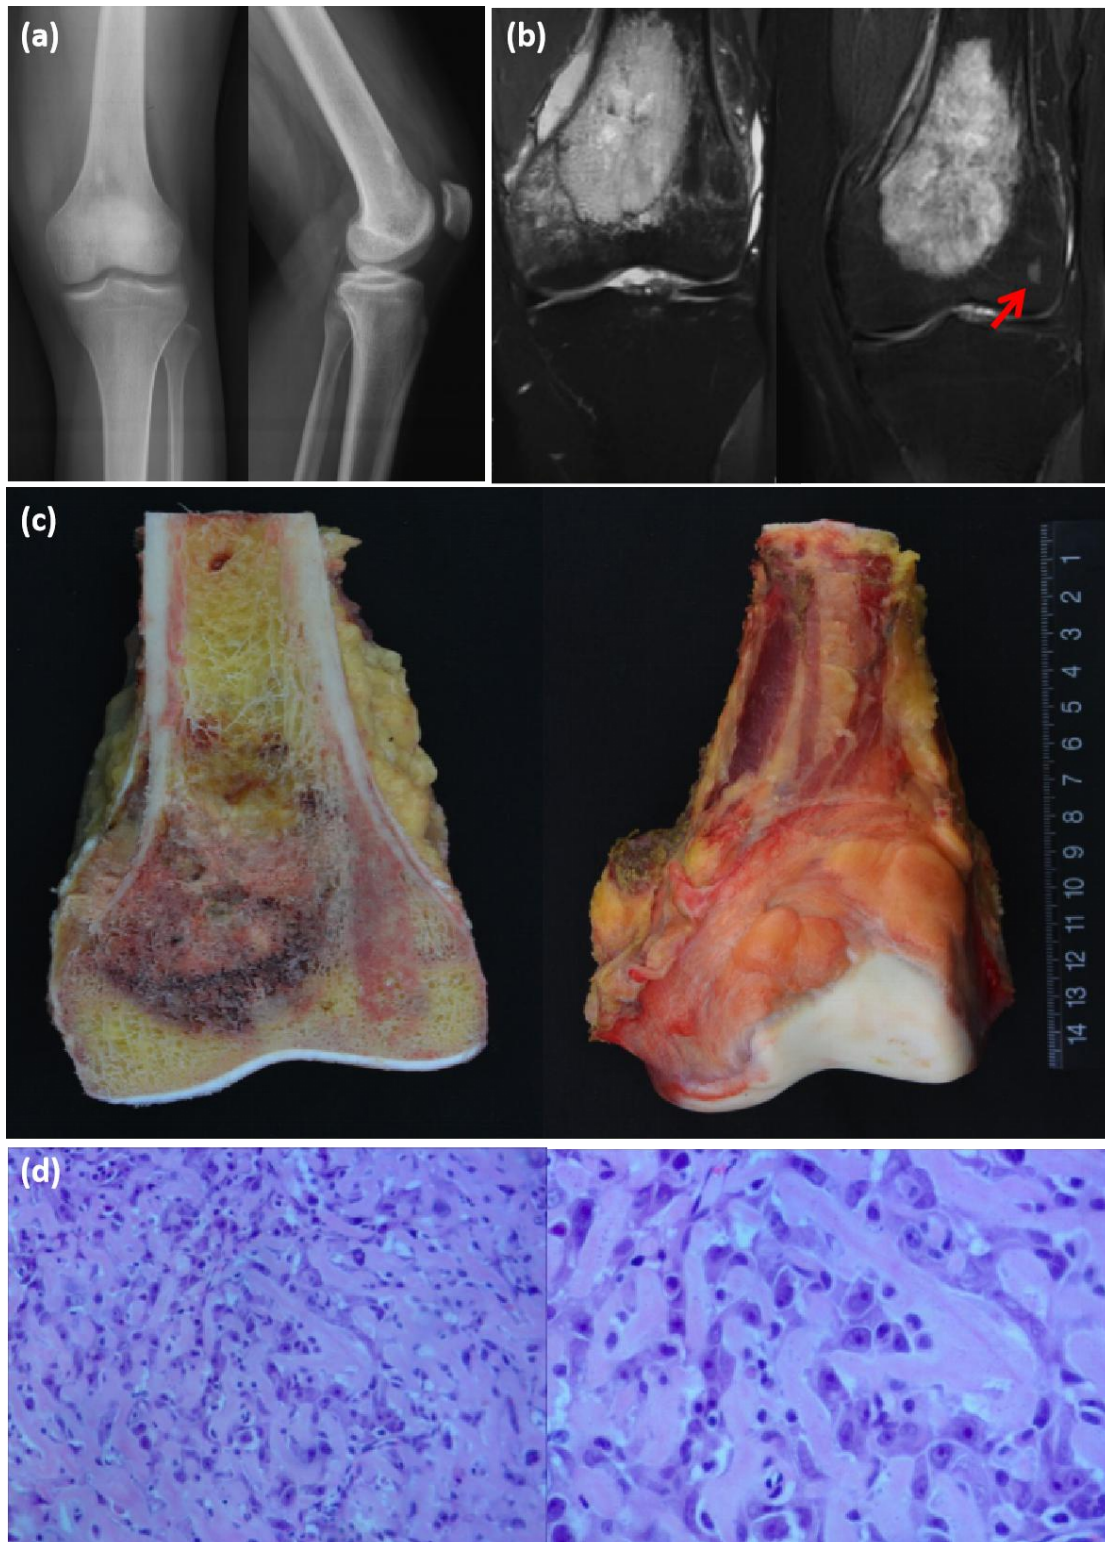

Figure 3 Medical materials of patient no.3. (a) X-ray showed a localized mass on the left distal femur. (b) MRI show a localized mass and a nearby skip lesion (red arrow)

on the left distal femurs. (c) Gross specimen of the resected primary tumor. (d) Hematoxylin and eosin (H&E) - stained slide of the primary tumor showed osteosarcoma.

Patient no.3 was a 13-year-old boy diagnosed of osteosarcoma at left distal femur. A skip lesion was observed on preoperative MRI. Routine preoperative of APMI was given, followed by distal femur replacement. The tumor showed good response to preoperative chemotherapy. The resection specimen proved to be an osteosarcoma and was analyzed for a necrosis rate of 85.3%. Postoperative chemotherapy of APMI was uneventful. Proximal sartorius metastasis was found at 5 months after completion of postoperative chemotherapy. Then the regional metastasis was resected. Rapid systematic progression was found even the patient was on IE and apatinib.

## YuanSu Panel Gene List

ABCB1  
ABL1  
ABL2  
ACVR1B  
ACVR2A  
ADAM29  
ADGRA2  
AKT1  
AKT2  
AKT3  
ALK  
ALOX12B  
AMER1  
ANTXR2  
APC  
APEX1  
APOBEC3B  
AQP3  
AR  
ARAF  
ARAP3  
ARFRP1  
ARHGAP4  
ARHGAP6  
ARHGDIA  
ARHGEF10  
ARHGEF17  
ARHGEF25  
ARHGEF3  
ARID1A  
ARID1B  
ARID2  
ASXL1  
ATF1  
ATM  
ATR  
ATRX  
AURKA  
AURKB  
AXIN1  
AXIN2  
AXL

B2M  
BAP1  
BARD1  
BCL2  
BCL2L1  
BCL2L11(BIM)  
BCL2L2  
BCL6  
BCL7A  
BCOR  
BCORL1  
BCR  
BIRC3  
BIRC5  
BLK  
BLM  
BMPR1A  
BMX  
BRAF  
BRCA1  
BRCA2  
BRD4  
BRIP1  
BTG1  
BTG2  
BTK  
BUB1  
CALR  
CAMTA1  
CARD11  
CASP8  
CBFB  
CBL  
CCN6  
CCNB3  
CCND1  
CCND2  
CCND3  
CCNE1  
CD1A  
CD1B  
CD1C  
CD1D  
CD1E



CD22  
CD274(PD-L1)  
CD36  
CD70  
CD74  
CD79A  
CD79B  
CDC42  
CDC73  
CDH1  
CDK12  
CDK2  
CDK4  
CDK6  
CDK8  
CDKN1A  
CDKN1B  
CDKN2A  
CDKN2B  
CDKN2C  
CEACAM3  
CEBPA  
CFTR  
CHD2  
CHD4  
CHEK1  
CHEK2  
CIC  
CLDN18  
COL1A1  
COL2A1  
CRBN  
CREB3L1  
CREB3L2  
CREBBP  
CRKL  
CRLF2  
CSF1  
CSF1R  
CSF3R  
CSK  
CSNK1A1  
CTCF  
CTLA4

CTNNA1  
CTNNA2  
CTNNA3  
CTNNB1  
CUL3  
CUL4A  
CXCR4  
CYLD  
CYP17A1  
CYP2D6  
DAXX  
DCTN1  
DDR1  
DDR2  
DEF6  
DICER1  
DIS3  
DLC1  
DNMT3A  
DNMT3B  
DOT1L  
DPYD  
DYNLL1  
E2F3  
ECT2  
EED  
EGF  
EGFR  
EMSY  
EP300  
EPAS1  
EPCAM  
EPHA2  
EPHA3  
EPHA5  
EPHA6  
EPHA7  
EPHA8  
EPHB1  
EPHB4  
ERBB2(HER2)  
ERBB3  
ERBB4  
ERCC1

ERCC2  
ERCC3  
ERCC4  
ERCC5  
ERG  
ERRFI1  
ESR1(ER)  
ETV1  
ETV4  
ETV5  
ETV6  
EWSR1(EWS)  
EZH2  
EZR  
FAM135B  
FANCA  
FANCC  
FANCD2  
FANCE  
FANCF  
FANCG  
FANCI  
FANCL  
FANCM  
FARP1  
FAS  
FAT1  
FAT3  
FAT4  
FBXO31  
FBXW7  
FEN1  
FEV  
FGF1  
FGF10  
FGF12  
FGF14  
FGF18  
FGF19  
FGF2  
FGF21  
FGF23  
FGF3  
FGF4

FGF5  
FGF6  
FGF7  
FGF9  
FGFR1  
FGFR2  
FGFR3  
FGFR4  
FGR  
FH  
FLCN  
FLI1  
FLT1  
FLT3  
FLT4  
FNDC3B  
FOS  
FOXL2  
FOXO1  
FOXP1  
FPR1  
FRS2  
FUBP1  
FUS  
FYN  
GABRA6  
GALNT12  
GATA1  
GATA2  
GATA3  
GATA4  
GATA6  
GID4  
GLI1  
GLI2  
GLI3  
GNA11  
GNA13  
GNAQ  
GNAS  
GREM1  
GRIN2A  
GRM3  
GSK3B

H2AX  
H3-3A  
H3-3B  
H3C2  
HCK  
HDAC1  
HDAC2  
HDAC9  
HGF  
HMGA1  
HMGA2  
HNF1A  
HOXB13  
HRAS  
HSD3B1  
HSP90AA1  
HTATIP2  
ID3  
IDH1  
IDH2  
IDO1  
IGF1R  
IGF2  
IKBKE  
IKZF1  
IL7R  
INHBA  
INPP4B  
IRF1  
IRF2  
IRF4  
IRS2  
ITK  
JAK1  
JAK2  
JAK3  
JAZF1  
JUN  
KAT6A  
KDM5A  
KDM5B  
KDM5C  
KDM6A  
KDR

KEAP1  
KEL  
KIT  
KLF5  
KLHL6  
KMT2A  
KMT2C  
KMT2D  
KNSTRN  
KRAS  
LCK  
LIMK1  
LMO1  
LRIG1  
LRP1  
LRP1B  
LRP2  
LTK  
LYN  
LZTR1  
MACC1  
MAF  
MAGI2  
MALAT1  
MAML2  
MAP2K1(MEK1)  
MAP2K2(MEK2)  
MAP2K4  
MAP3K1  
MAP3K13  
MAP4K5  
MAPK1  
MAX  
MCF2L  
MCL1  
MDM2  
MDM4  
MECOM  
MED12  
MEF2B  
MEN1  
MERTK  
MET  
MGMT

MITF  
MKNK1  
MLH1  
MLLT3  
MPL  
MR1  
MRE11  
MS4A1  
MSH2  
MSH3  
MSH6  
MST1R  
MTAP  
MTG1  
MTOR  
MUC16  
MUTYH  
MYB  
MYBL1  
MYC  
MYCL  
MYCN  
MYD88  
MYH11  
MYOD1  
NAB2  
NBN  
NCOA2  
NCOR1  
NECTIN4  
NEK11  
NET1  
NF1  
NF2  
NFE2L2  
NFIB  
NFKBIA  
NKX2-1  
NOTCH1  
NOTCH2  
NOTCH3  
NOTCH4  
NPAT  
NPM1

NR4A3  
NRAS  
NRG1  
NRG3  
NSD1  
NSD2  
NSD3  
NT5C2  
NTHL1  
NTRK1  
NTRK2  
NTRK3  
NUP88  
NUP93  
NUTM1  
OBSCN  
P2RY8  
PAK1  
PAK3  
PALB2  
PARP1  
PARP2  
PARP3  
PARP4  
PAX3  
PAX5  
PAX7  
PBRM1  
PBX1  
PCA3  
PDCD1(PD-1)  
PDCD1LG2  
PDCD1LG2(PD-L2)  
PDGFB  
PDGFRA  
PDGFRB  
PDK1  
PHF6  
PHOX2B  
PIK3C2B  
PIK3C2G  
PIK3C3  
PIK3CA  
PIK3CB



PIK3CD  
PIK3CG  
PIK3R1  
PIK3R2  
PIM1  
PKD2  
PKN1  
PLA2G1B  
PLCG2  
PML  
PMS2  
POLB  
POLD1  
POLE  
POT1  
PPARG  
PPP2R1A  
PPP2R2A  
PRDM1  
PREX2  
PRF1  
PRKACA  
PRKACB  
PRKAR1A  
PRKCI  
PRKDC  
PRKN  
PRPF38B  
PRSS1  
PRSS8  
PTCH1  
PTEN  
PTK2  
PTK6  
PTPN11  
PTPRO  
PTPRT  
QKI  
RAC1  
RAD17  
RAD21  
RAD50  
RAD51  
RAD51B

RAD51C  
RAD51D  
RAD52  
RAD54B  
RAD54L  
RAF1  
RANBP2  
RARA  
RASA1  
RB1  
RBM10  
RECQL  
RECQL4  
REL  
RELA  
RELB  
RET  
REV3L  
RGS7  
RHBDF2  
RHEB  
RHOA  
RICTOR  
RIT1  
RNASEL  
RNF43  
ROCK1  
ROCK2  
ROS1  
RPTOR  
RSPO2  
RSPO3  
RUNX1  
RUNX1T1  
RXRA  
SDC4  
SDHA  
SDHAF2  
SDHB  
SDHC  
SDHD  
SERPINB3  
SERPINB4  
SETBP1

SETD2  
SF3B1  
SGK1  
SHOC2  
SHQ1  
SIK1  
SKP2  
SLC1A2  
SLC34A2  
SLC6A2  
SLIT2  
SLX4  
SMAD2  
SMAD3  
SMAD4  
SMARCA2  
SMARCA4  
SMARCB1  
SMARCD1  
SMARCE1  
SMO  
SNCAIP  
SND1  
SOCS1  
SOX10  
SOX2  
SOX9  
SPEN  
SPINK1  
SPOP  
SPTA1  
SRC  
SRGAP1  
SRMS  
SRSF2  
SS18  
SSX1  
STAG2  
STAT3  
STAT4  
STAT6  
STK11  
STK24  
SUFU

SUZ12  
SYK  
TACSTD2  
TAF1  
TBX3  
TCF3  
TCF7L2  
TEK  
TENT5C  
TERC  
TERT  
TET1  
TET2  
TET3  
TFE3  
TFEB  
TGFB1  
TGFB2  
TIE1  
TIPARP  
TLX1  
TMEM127  
TMPRSS2  
TNFAIP3  
TNFRSF14  
TNFRSF19  
TNFSF11  
TNFSF13B  
TNK2  
TOP1  
TOP2A  
TP53  
TP63  
TPMT  
TRAF7  
TRIO  
TSC1  
TSC2  
TSHR  
TSPAN1  
TSPAN31  
TYK2  
TYRO3  
U2AF1

UGT1A1  
USP6  
VEGFA  
VGLL3  
VHL  
WEE1  
WEE2  
WNK1  
WRN  
WT1  
XIAP  
XPO1  
XRCC2  
XRCC3  
YAP1  
YES1  
YWHAE  
ZBTB2  
ZFHX3  
ZNF217  
ZNF703  
ZNF750  
ZRSR2

## **Osteosarcoma Metastasis-associated Mutations**

ANGPTL4  
CCDC80  
CCL5  
COX-2  
CSF-1  
CTGF  
CXCL8  
CXCR4  
CXCR4/CXCL12 pathway  
DAB2  
DEPDC6  
DLX4  
EHF  
endothelin-1  
EREG  
ezrin  
FGFR  
FHOD3  
FOXQ1  
gp78  
ID1  
IL6  
interleukin-11  
LOX  
LOX  
MET  
MMP-1  
MMP-9  
mTOR  
NEDD9  
Notch pathway  
OSMR  
PAX3  
PCBD1  
PHLDA1  
PKC  
RANKL  
RHoC  
SERPINE2  
SLC1A3  
TGFB2  
TGF $\beta$

TP53 deletion

TPM1

TWIST1

VEGF

WNT/ $\beta$ -catenin pathway

$\Delta$ Np63 pathway
